# Supplementary material
Source: PubMed Central journal article supplement (PMC3003365)

## SUPPLEMENTAL DATA

### Structural Basis for Proficient Incorporation of dTTP Opposite *O*<sup>6</sup>-Methylguanine by Human DNA Polymerase $\epsilon$

Matthew G. Pence, Jeong-Yun Choi, Martin Egli, and F. Peter Guengerich  
*J. Biol. Chem.* **285**, XXX-XXX (2010)

## CONTENTS

FIGURE S1. Purification of the human pol  $\epsilon$  catalytic fragment (amino acids 1-420).

**FIGURE S1. Purification of the human pol  $\iota$  catalytic fragment (amino acids 1-420).** *A*, FPLC elution profile showing peaks from PreScission Protease incubation (a) and after washing with 20 mM glutathione (b). *B*, SDS-PAGE of purified human pol  $\iota$ . Lane 1: Markers (M), lane 2: Pre-induction sample (Pre), lane 3: Pol  $\iota$  (a, corresponds to peak a from Fig. S1A), lane 4: empty, and lane 5: glutathione wash (b, corresponds to peak b from Fig. S1A).

Figure S1

**A**

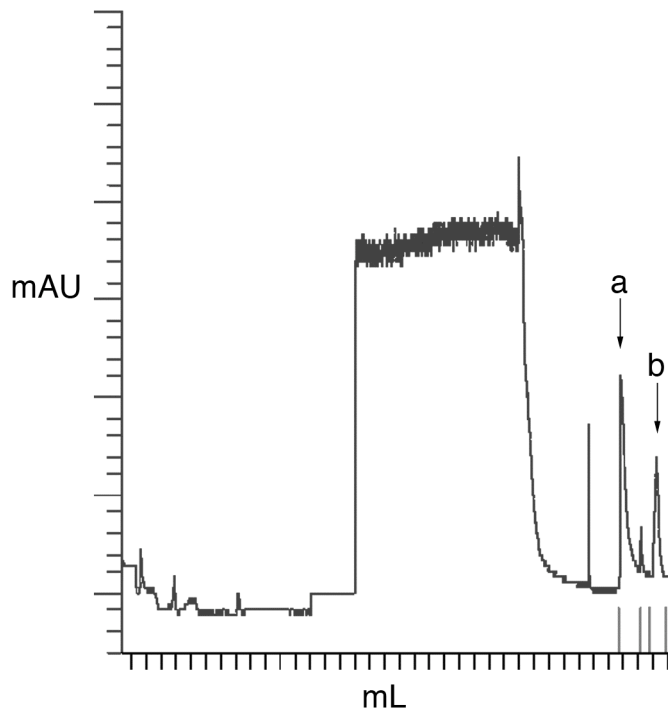

**B**

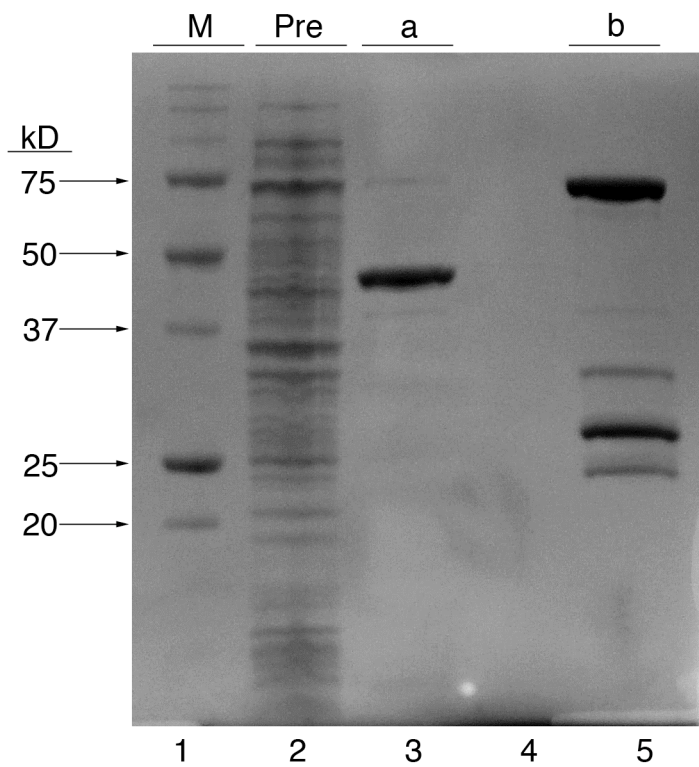

Supplement: supp_M110.183665_jbc.M110.183665-1.pdf [file supp_M110.183665_jbc.M110.183665-1.pdf]
